# Supplementary material for: Exploring the potential of Fourier transform-infrared spectroscopy of urine for non-invasive monitoring of inflammation associated with a kidney transplant
Source: Royal Society of Chemistry journal article supplement (doi:10.1039/d4an01459f), 2025-01-01
Supplement: d4an01459f1.pdf [file d4an01459f1.pdf]

## Supplemental Data

# Exploring the Potential of Fourier Transform-infrared Spectroscopy of Urine for Non-invasive Monitoring of Inflammation associated with Kidney Transplant.

Elie SARKEES<sup>1</sup>, Vincent VUIBLET<sup>1,2,3</sup>, Stéphane LARRE<sup>1,4</sup>, Fayek TAHA<sup>4</sup>, Olivier PIOT<sup>1\*</sup>.

<sup>1</sup>BioSpecT UR7506, Université de Reims Champagne-Ardenne, Reims, France ;

<sup>2</sup>Department of Biopathology, CHU de Reims, Reims, France ;

<sup>3</sup>IIAS, CHU de Reims, Université de Reims Champagne-Ardenne, Reims, France

<sup>4</sup> Department of Urology, CHU de Reims, Reims, France ;

### \*Correspondence

Olivier PIOT, BioSpecT laboratory and Cellular and Tissular Imaging Platform (PICT), Université de Reims Champagne-Ardenne, Reims, France.

[olivier.piot@univ-reims.fr](mailto:olivier.piot@univ-reims.fr)

[eliesarkees2@hotmail.com](mailto:eliesarkees2@hotmail.com)

[vvuiblet@chu-reims.fr](mailto:vvuiblet@chu-reims.fr)

[slarre@chu-reims.fr](mailto:slarre@chu-reims.fr)

[ftaha@chu-reims.fr](mailto:ftaha@chu-reims.fr)

**Fig. S1** Representative spectral profiles of the control and pathologic groups, showing the mean spectrum with the standard deviation for each category

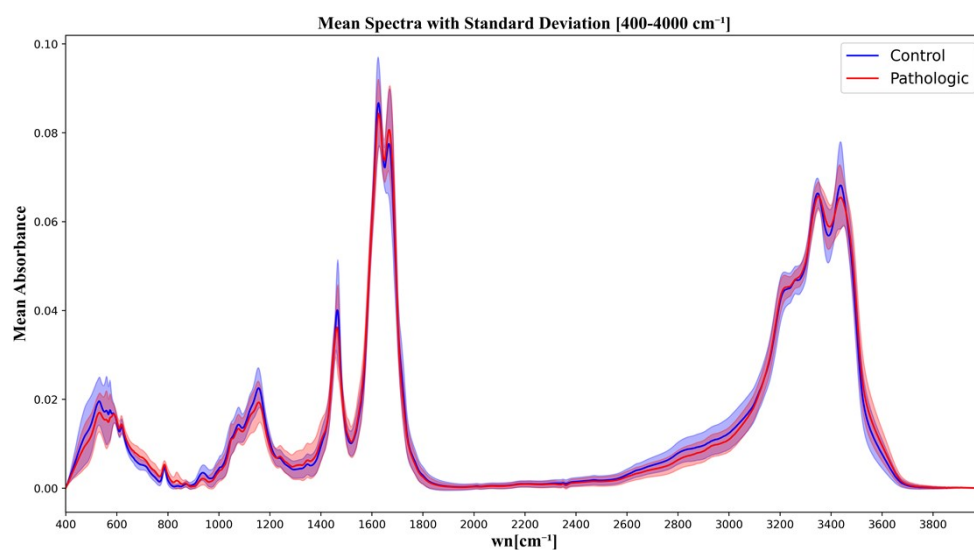

**Table S1** List of pharmaceutical active substances ordered according to their prescription frequency

|    | Active Substance                         | Use                                           |
|----|------------------------------------------|-----------------------------------------------|
| 1  | Tacrolimus                               | Immunosuppressant                             |
| 2  | Mycophenolic Acid                        | Immunosuppressant                             |
| 3  | Prednisolone                             | Corticosteroid                                |
| 4  | Ciclosporin (Cyclosporine)               | Immunosuppressant                             |
| 5  | Darbepoetin Alfa                         | Erythropoiesis-Stimulating Agent              |
| 6  | Cholecalciferol (Vitamin D3)             | Vitamin Supplement                            |
| 7  | Furosemide                               | Diuretic                                      |
| 8  | Trimethoprim + Sulfamethoxazole          | Antibiotic                                    |
| 9  | Amlodipine                               | Calcium Channel Blocker                       |
| 10 | Valganciclovir                           | Antiviral                                     |
| 11 | Polystyrene Sulfonate                    | Potassium Binder                              |
| 12 | Phosphorus                               | Supplement                                    |
| 13 | Lansoprazole                             | Proton Pump Inhibitor                         |
| 14 | Sodium Bicarbonate (NaHCO <sub>3</sub> ) | Alkalinizing Agent                            |
| 15 | Ramipril                                 | Angiotensin-converting enzyme (ACE) Inhibitor |
| 16 | Folic Acid (Vitamin B9)                  | Vitamin Supplement                            |
| 17 | Magnesium (Mg <sup>2+</sup> )            | Supplement                                    |
| 18 | Calcium (Ca <sup>2+</sup> )              | Supplement                                    |
| 19 | Iron (Ferrous Salt)                      | Supplement                                    |
| 20 | Potassium (K <sup>+</sup> )              | Supplement                                    |
| 21 | Everolimus                               | Immunosuppressant                             |
| 22 | Prednisone                               | Corticosteroid                                |
| 23 | Paracetamol (Acetaminophen)              | Analgesic                                     |
| 24 | Insulin Lispro                           | Insulin                                       |

|    |                                |                                                           |
|----|--------------------------------|-----------------------------------------------------------|
| 25 | Lercanidipine                  | Calcium Channel Blocker                                   |
| 26 | Irbesartan                     | Angiotensin II Receptor Blocker                           |
| 27 | Aciclovir (Acyclovir)          | Antiviral                                                 |
| 28 | Atovaquone                     | Antiprotozoal                                             |
| 29 | Pantoprazole                   | Proton Pump Inhibitor                                     |
| 30 | Belatacept                     | Immunosuppressant                                         |
| 31 | Rilmenidine                    | Antihypertensive                                          |
| 32 | Warfarin                       | Anticoagulant                                             |
| 33 | Human Immunoglobulin G (IgG)   | Immunoglobulin Replacement                                |
| 34 | Esomeprazole                   | Proton Pump Inhibitor                                     |
| 35 | Acetylsalicylic Acid (Aspirin) | Nonsteroidal Anti-Inflammatory Drugs (NSAID)/Antiplatelet |
| 36 | Perindopril                    | Angiotensin-converting enzyme (ACE) Inhibitor             |
| 37 | Valsartan                      | Angiotensin II Receptor Blocker                           |
| 38 | Calcium Heparin                | Anticoagulant                                             |
| 39 | Metformin                      | Antidiabetic                                              |
| 40 | Pentamidine                    | Antiprotozoal                                             |
| 41 | Phloroglucinol                 | Antispasmodic                                             |
| 42 | Eculizumab                     | Monoclonal Antibody                                       |
| 43 | Metoclopramide                 | Antiemetic/Prokinetic                                     |
| 44 | Spirolactone                   | Aldosterone Antagonist                                    |
| 45 | Cetirizine                     | Antihistamine                                             |
| 46 | Methylprednisolone             | Corticosteroid                                            |
| 47 | Ketoconazole                   | Antifungal                                                |
| 48 | Metoprolol                     | Beta-blocker                                              |
| 49 | Prazepam                       | Anxiolytic                                                |
| 50 | Alfacalcidol                   | Vitamin D Analog                                          |
